# Supplementary material
Source: PubMed Central journal article supplement (PMC1975851)
Supplement: blood_blood-2006-12-065623_1.pdf [file blood_blood-2006-12-065623_1.pdf]

| Group   | Animal ID | Year of birth | Year of PBPCT | Sex    | CD34+ cell dose/kg  | CD34+ cell purity (%) | CD3+ cells in graft (%) | CD3+ cell dose/kg    |
|---------|-----------|---------------|---------------|--------|---------------------|-----------------------|-------------------------|----------------------|
| sd KGF  | RQ3602    | 1998          | 2003          | female | 7.9x10 <sup>6</sup> | 95                    | 1.6                     | 1.3x10 <sup>5</sup>  |
| sd KGF  | RQ2932    | 2000          | 2003          | male   | 5.3x10 <sup>6</sup> | 95                    | 3.1                     | 1.6x10 <sup>5</sup>  |
| sd KGF  | CJ2T      | 2000          | 2003          | male   | 5.4x10 <sup>6</sup> | 90                    | 3.7                     | 2x10 <sup>5</sup>    |
| sd KGF  | RQ2614    | 1998          | 2003          | female | 7.4x10 <sup>6</sup> | 89                    | 4.9                     | 3x10 <sup>5</sup>    |
| md KGF  | RQ4715    | 2000          | 2004          | male   | 6.2x10 <sup>6</sup> | 96                    | 1.4                     | 0.8x10 <sup>5</sup>  |
| md KGF  | RQ4831    | 2000          | 2004          | male   | 3.4x10 <sup>6</sup> | 85                    | 1.2                     | 0.5x10 <sup>5</sup>  |
| control | RC810     | 1998          | 2003          | male   | 4.4x10 <sup>6</sup> | 96                    | 2.5                     | 1.2x10 <sup>5</sup>  |
| control | CJ2G      | 2000          | 2003          | male   | 5.0x10 <sup>6</sup> | 94                    | 5.6                     | 2.9x10 <sup>5</sup>  |
| control | RQ3576    | 1998          | 2003          | female | 5.3x10 <sup>6</sup> | 86                    | 3.4                     | 2.1x10 <sup>5</sup>  |
| control | CJ5D      | 2000          | 2003          | male   | 4.2x10 <sup>6</sup> | 90                    | 3.0                     | 1.4x10 <sup>5</sup>  |
| control | RQ3564    | 1998          | 2003          | female | 7.3x10 <sup>6</sup> | 93                    | 1.0                     | 0.78x10 <sup>5</sup> |

sd: single dose KGF; md: multiple doses KGF
