# Supplementary material
Source: PubMed Central journal article supplement (PMC1975851)
Supplement: blood_blood-2006-12-065623_2.pdf [file blood_blood-2006-12-065623_2.pdf]

|                                | <b>Cell Marker</b> | <b>Antibody Clone</b> | <b>Fluorochrome</b> |
|--------------------------------|--------------------|-----------------------|---------------------|
| <b>CD4<sup>+</sup> T cells</b> | CD28               | CD28.2                | FITC                |
|                                | Integrin $\beta$ 7 | FIB504                | PE                  |
|                                | CD4                | L-200                 | PerCP               |
|                                | CD95               | DX2                   | APC                 |
| <b>CD8<sup>+</sup> T cells</b> | CD11a              | HI111                 | FITC                |
|                                | CD28               | CD28.2                | PE                  |
|                                | CD8 $\beta$        | 2ST8.5H7              | Cy5PE               |
|                                | CD95               | DX2                   | APC                 |
| <b>CD4/8 Ratio</b>             | CD3                | SP34                  | FITC                |
|                                | CD4                | L-200                 | PerCP               |
|                                | CD8 $\beta$        | 2ST8.5H7              | APC                 |
| <b>Proliferation</b>           | Ki67               | B56                   | FITC                |
|                                | CD8 $\beta$        | 2ST8.5H7              | PE                  |
|                                | CD4                | L-200                 | PerCP               |
|                                | CD95               | DX2                   | APC                 |
